# Supplementary material for: Consequences of Substitution Model Selection on Protein Ancestral Sequence Reconstruction
Source: PubMed Central journal article supplement — Mol Biol Evol. 2022 Jul 5;39(7):msac144. doi: 10.1093/molbev/msac144 (PMC9254009; doi:10.1093/molbev/msac144), 2022-07-05
Supplement: msac144_supplementary_data.pdf [file msac144_supplementary_data.pdf]

## **Supplementary Material**

### ***Consequences of substitution model selection on protein ancestral sequence reconstruction***

The supplementary material includes Figures S1-S5 and Tables S1-S2.

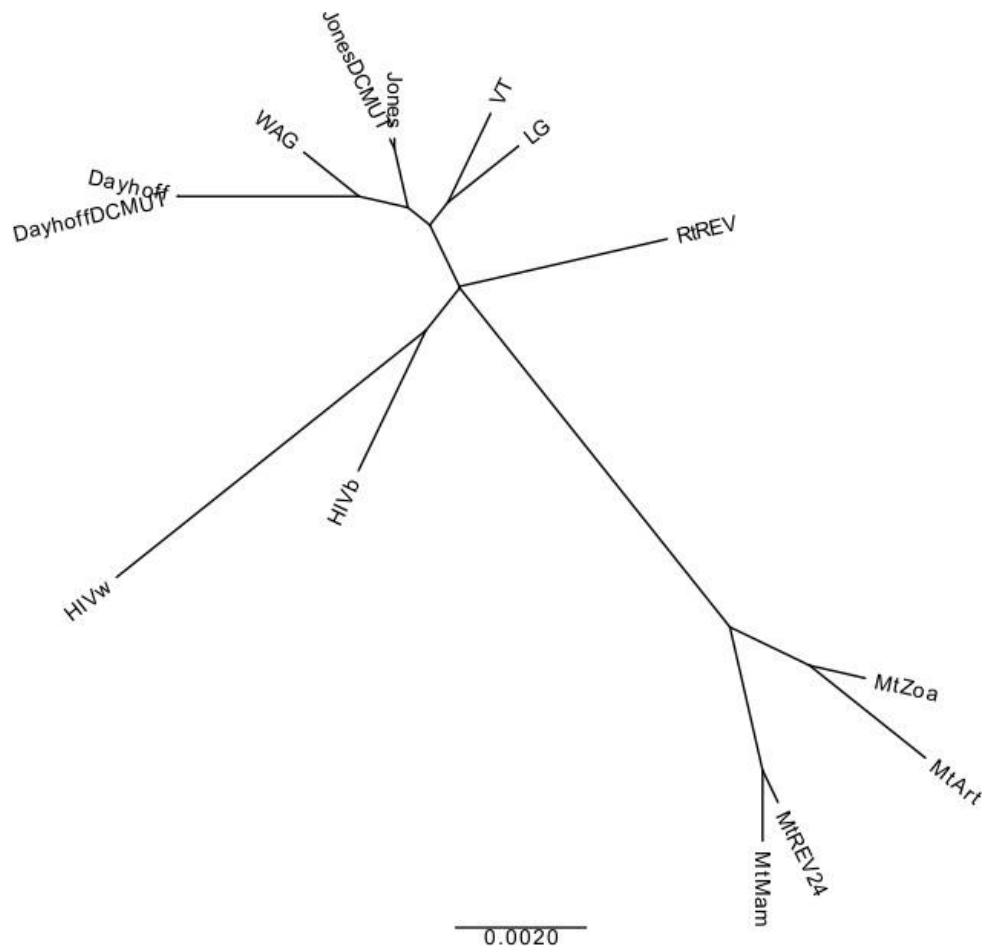

**Figure S1. Agglomerative clustering of empirical substitution models of protein evolution traditionally used in phylogenetics.** The figure shows the clustering of empirical substitution models of protein evolution that are traditionally applied in phylogenetics based on the distance between the normalized amino acid frequencies and exchangeability matrices.

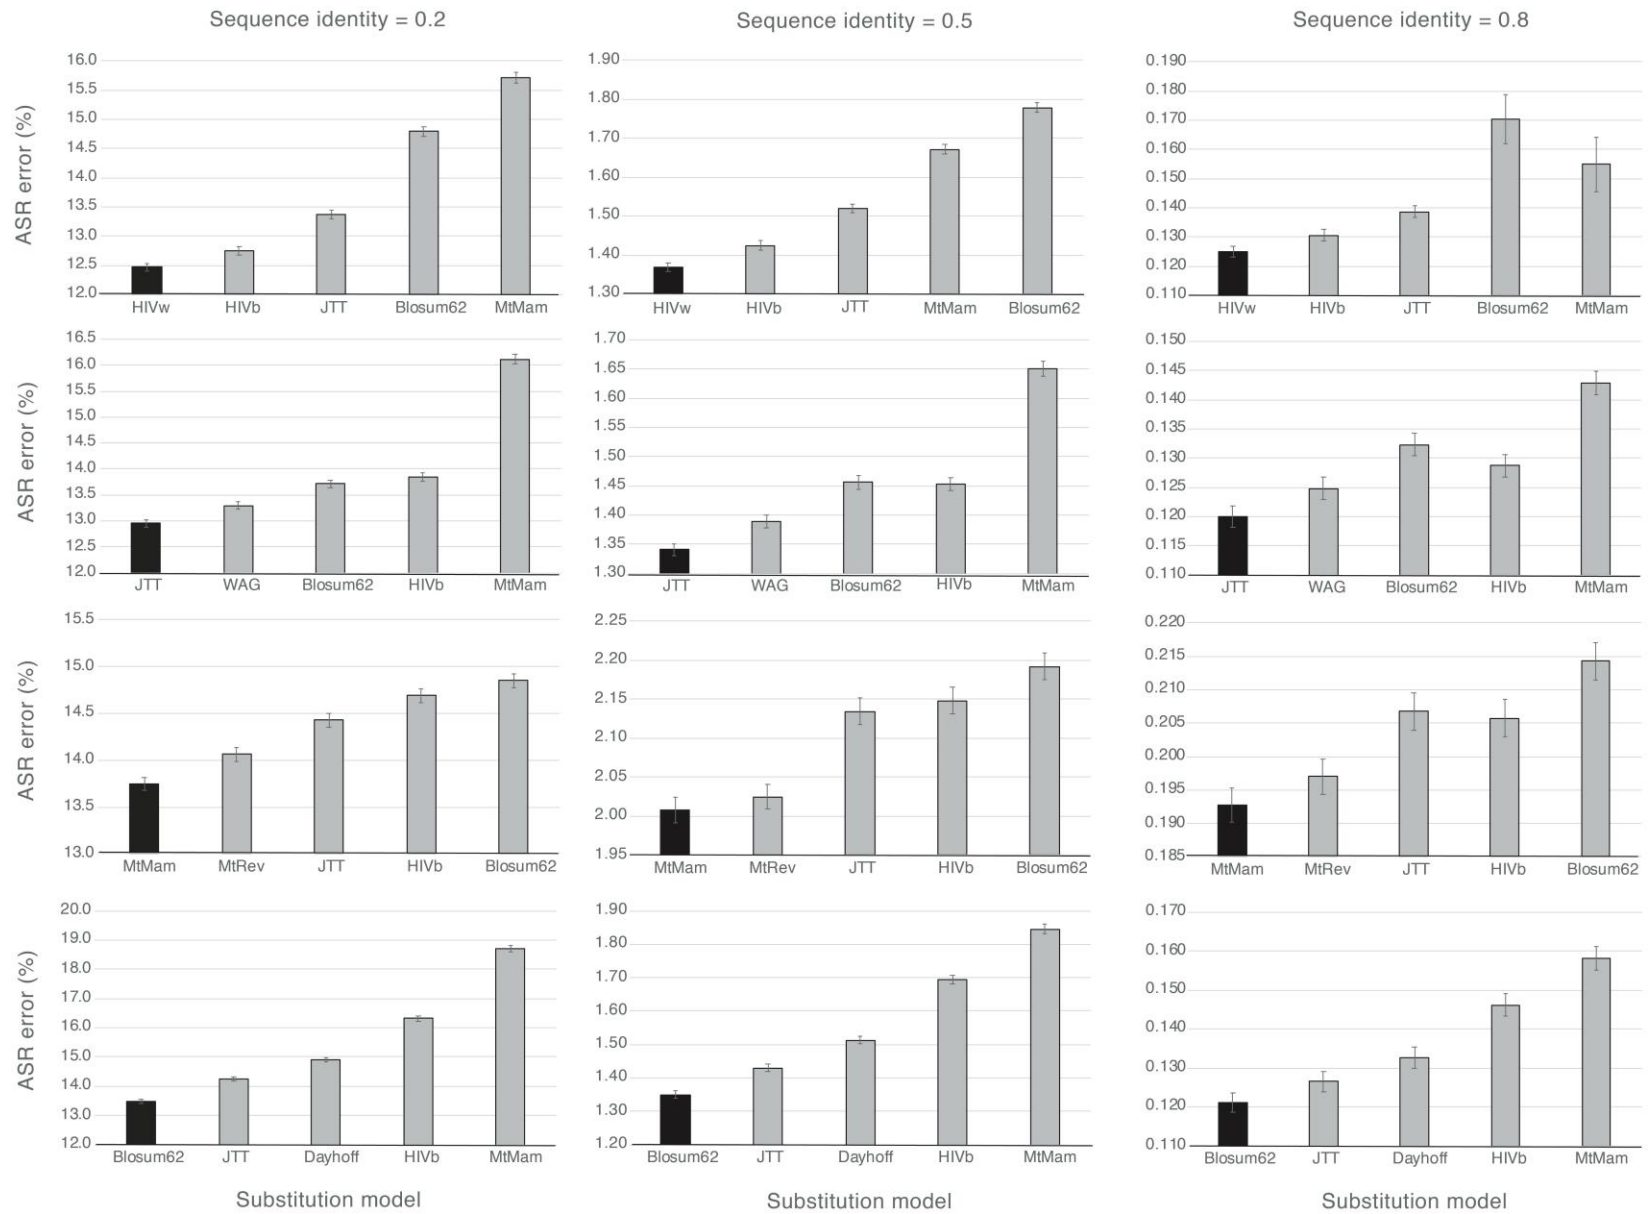

**Figure S2. Influence of substitution model selection on ancestral sequence reconstruction using data simulated with 100 protein sequences.** Distances between true ancestral sequences and ancestral sequences reconstructed under true (black bars) and other substitution models (grey bars; including from the left to the right a model that is similar, intermediate and far from the true model). The distances are shown in percentage. The study is based on 1000 simulated datasets of 100 protein sequences with sequence identity of 0.2 (large genetic diversity; plots on the left), 0.5 (intermediate genetic diversity; middle plots) and 0.8 (low genetic diversity; plots on the right). Error bars indicate 95% confidence intervals. The same results showing ASR error (Y-axis) from zero is presented in the Figure S4 (Supplementary Material).

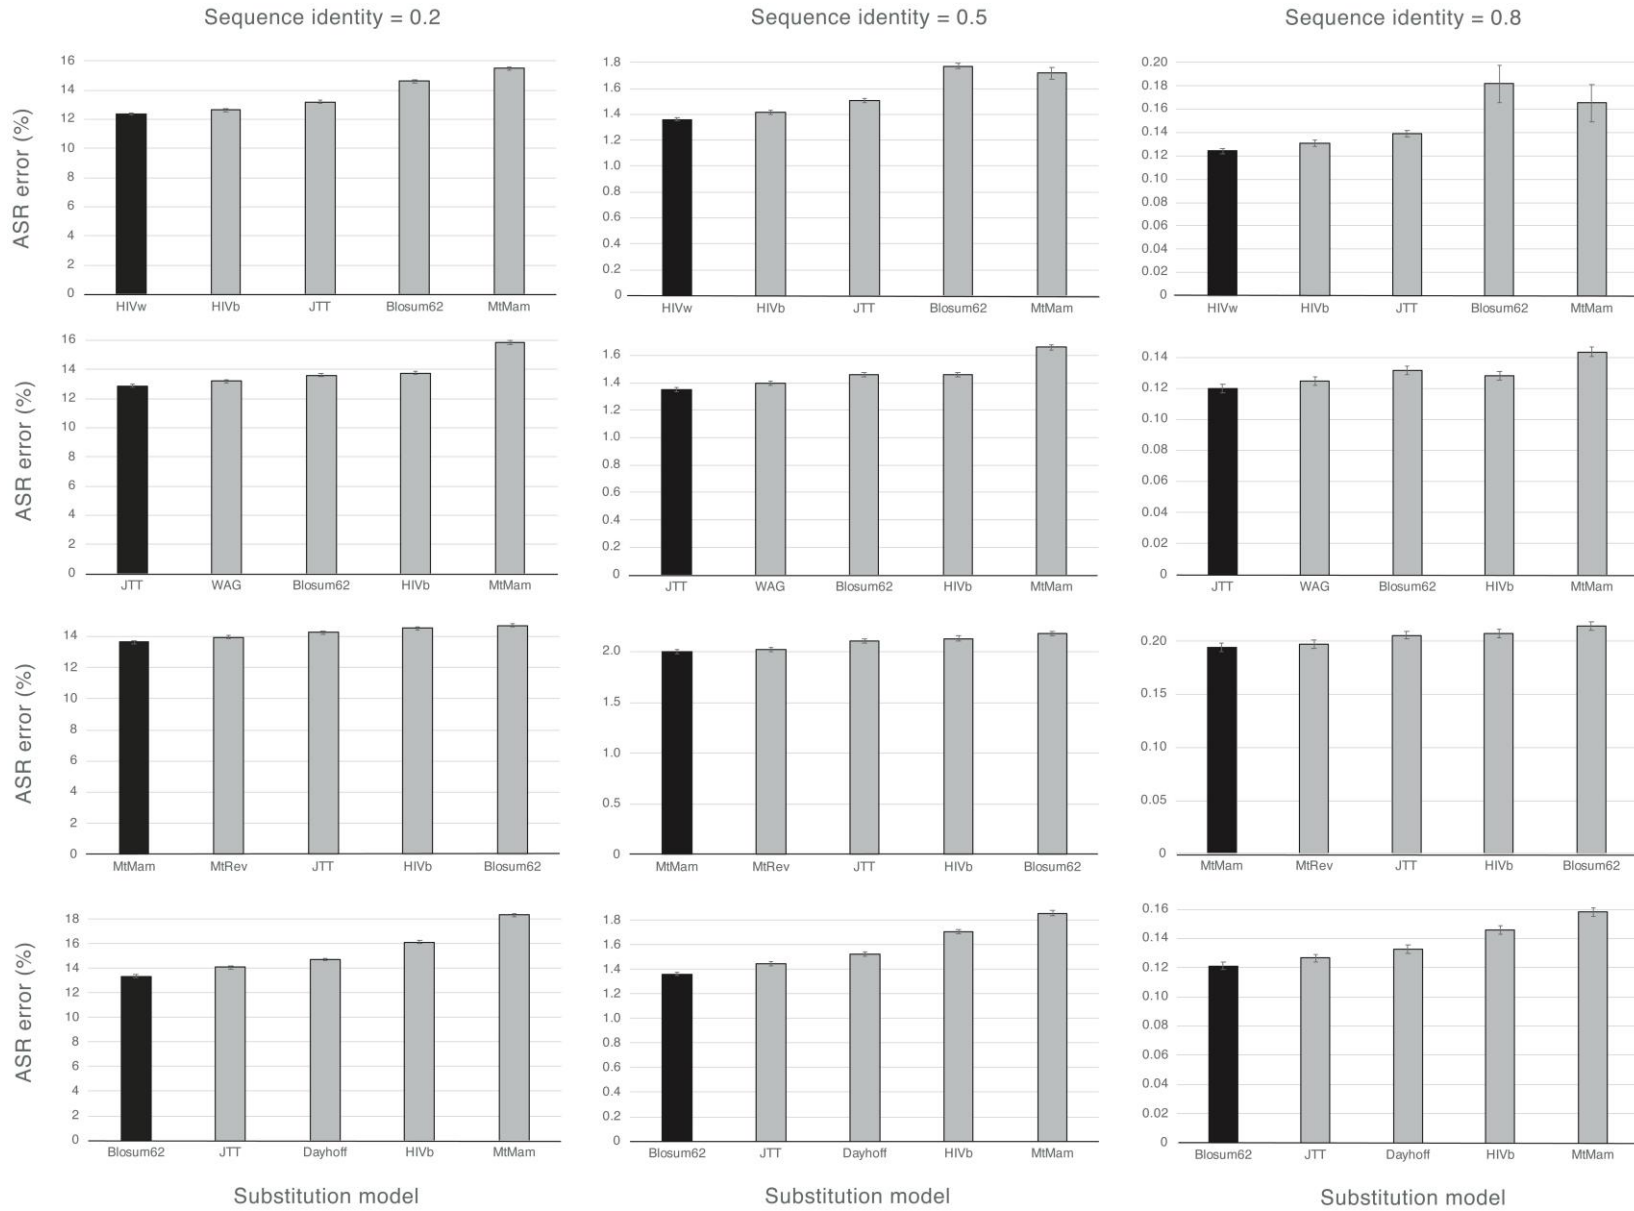

**Figure S3. Influence of substitution model selection on ancestral sequence reconstruction using simulated data showing ASR error (Y-axis) from zero.** Distances between true ancestral sequences and ancestral sequences reconstructed under true (black bars) and other substitution models (grey bars; including from the left to the right a model that is similar, intermediate and far from the true model). The distances are shown in percentage. The study is based on 1000 simulated datasets of 50 protein sequences with sequence identity 0.2 (large genetic diversity; plots on the left), 0.5 (intermediate genetic diversity; middle plots) and 0.8 (low genetic diversity; plots on the right). Error bars indicate 95% confidence intervals. The statistical differences among the ASR error caused by the studied substitution models are better visualized in Figure 1.

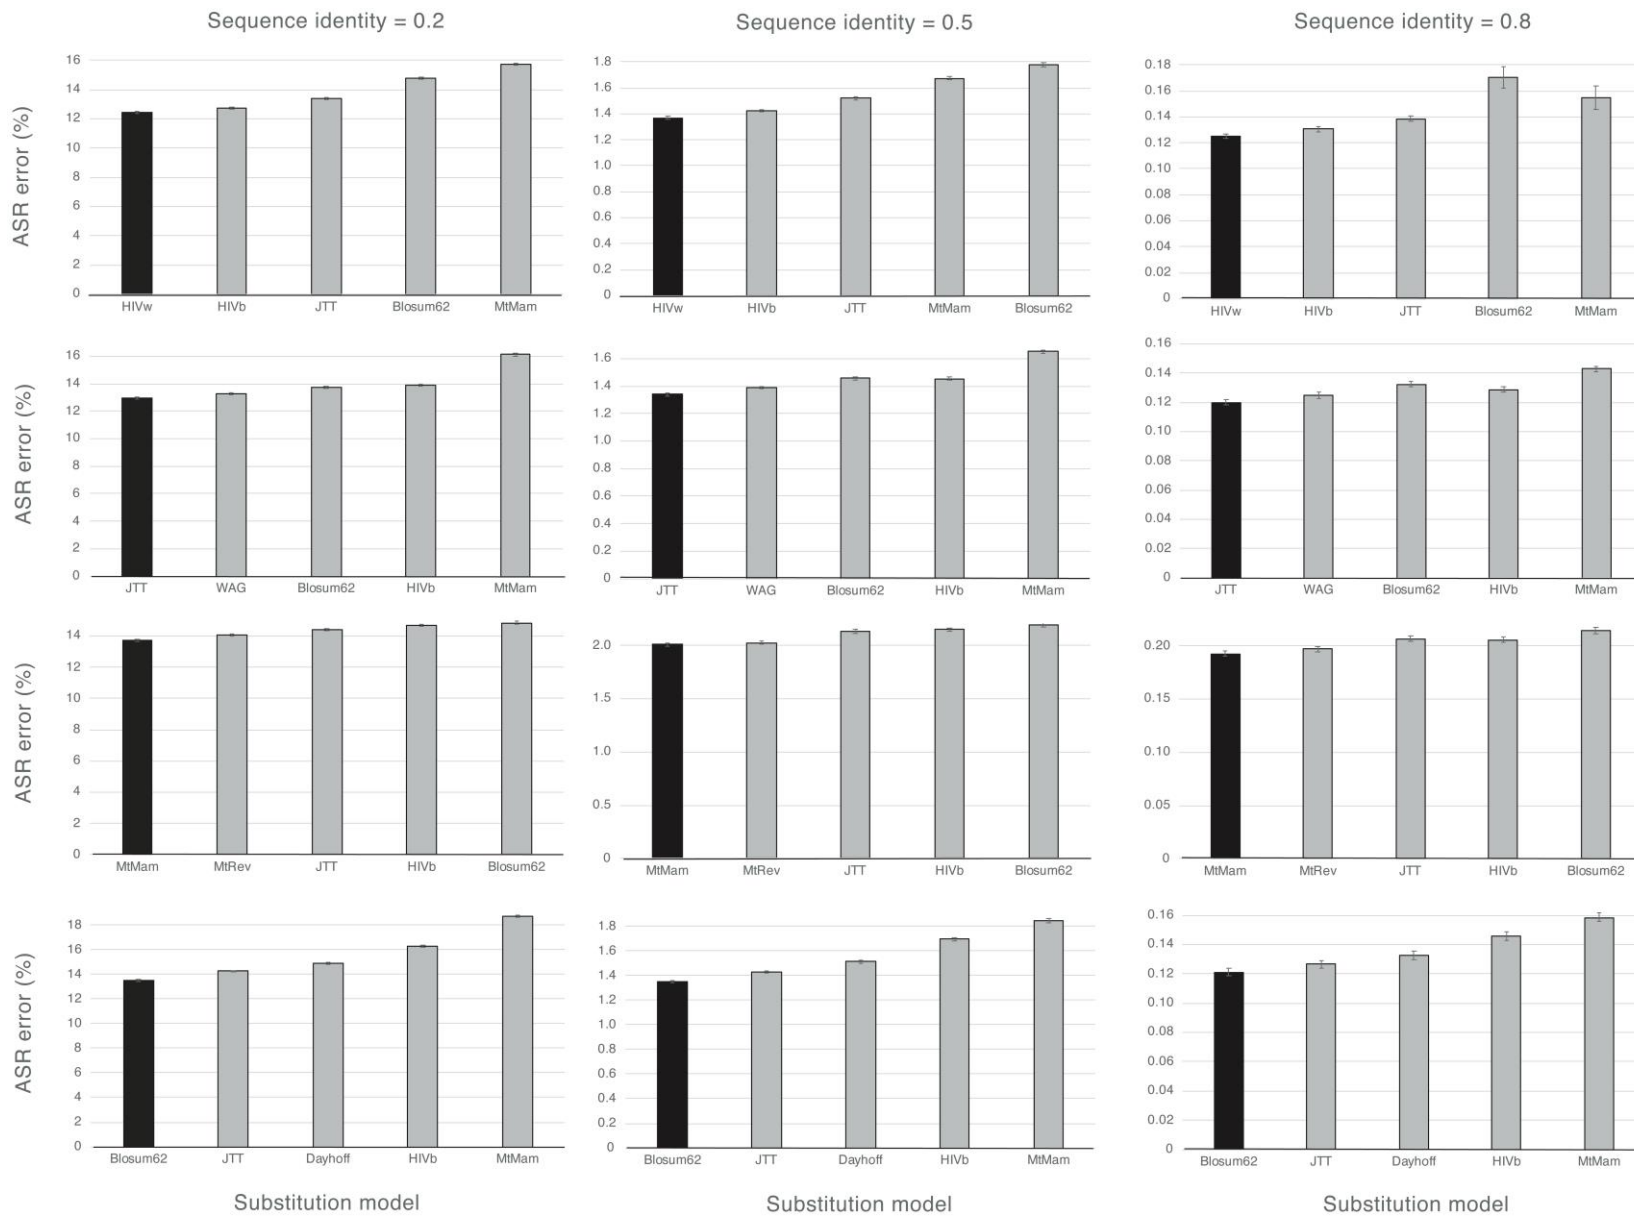

**Figure S4. Influence of substitution model selection on ancestral sequence reconstruction using data simulated with 100 protein sequences including ASR error (Y-axis) from zero.** Distances between true ancestral sequences and ancestral sequences reconstructed under true (black bars) and other substitution models (grey bars; including from the left to the right a model that is similar, intermediate and far from the true model). The distances are shown in percentage. The study is based on 1000 simulated datasets of 100 protein sequences with sequence identity of 0.2 (large genetic diversity; plots on the left), 0.5 (intermediate genetic diversity; middle plots) and 0.8 (low genetic diversity; plots on the right). Error bars indicate 95% confidence intervals. The statistical differences among the ASR error caused by the studied substitution models are better visualized in Figure S2.



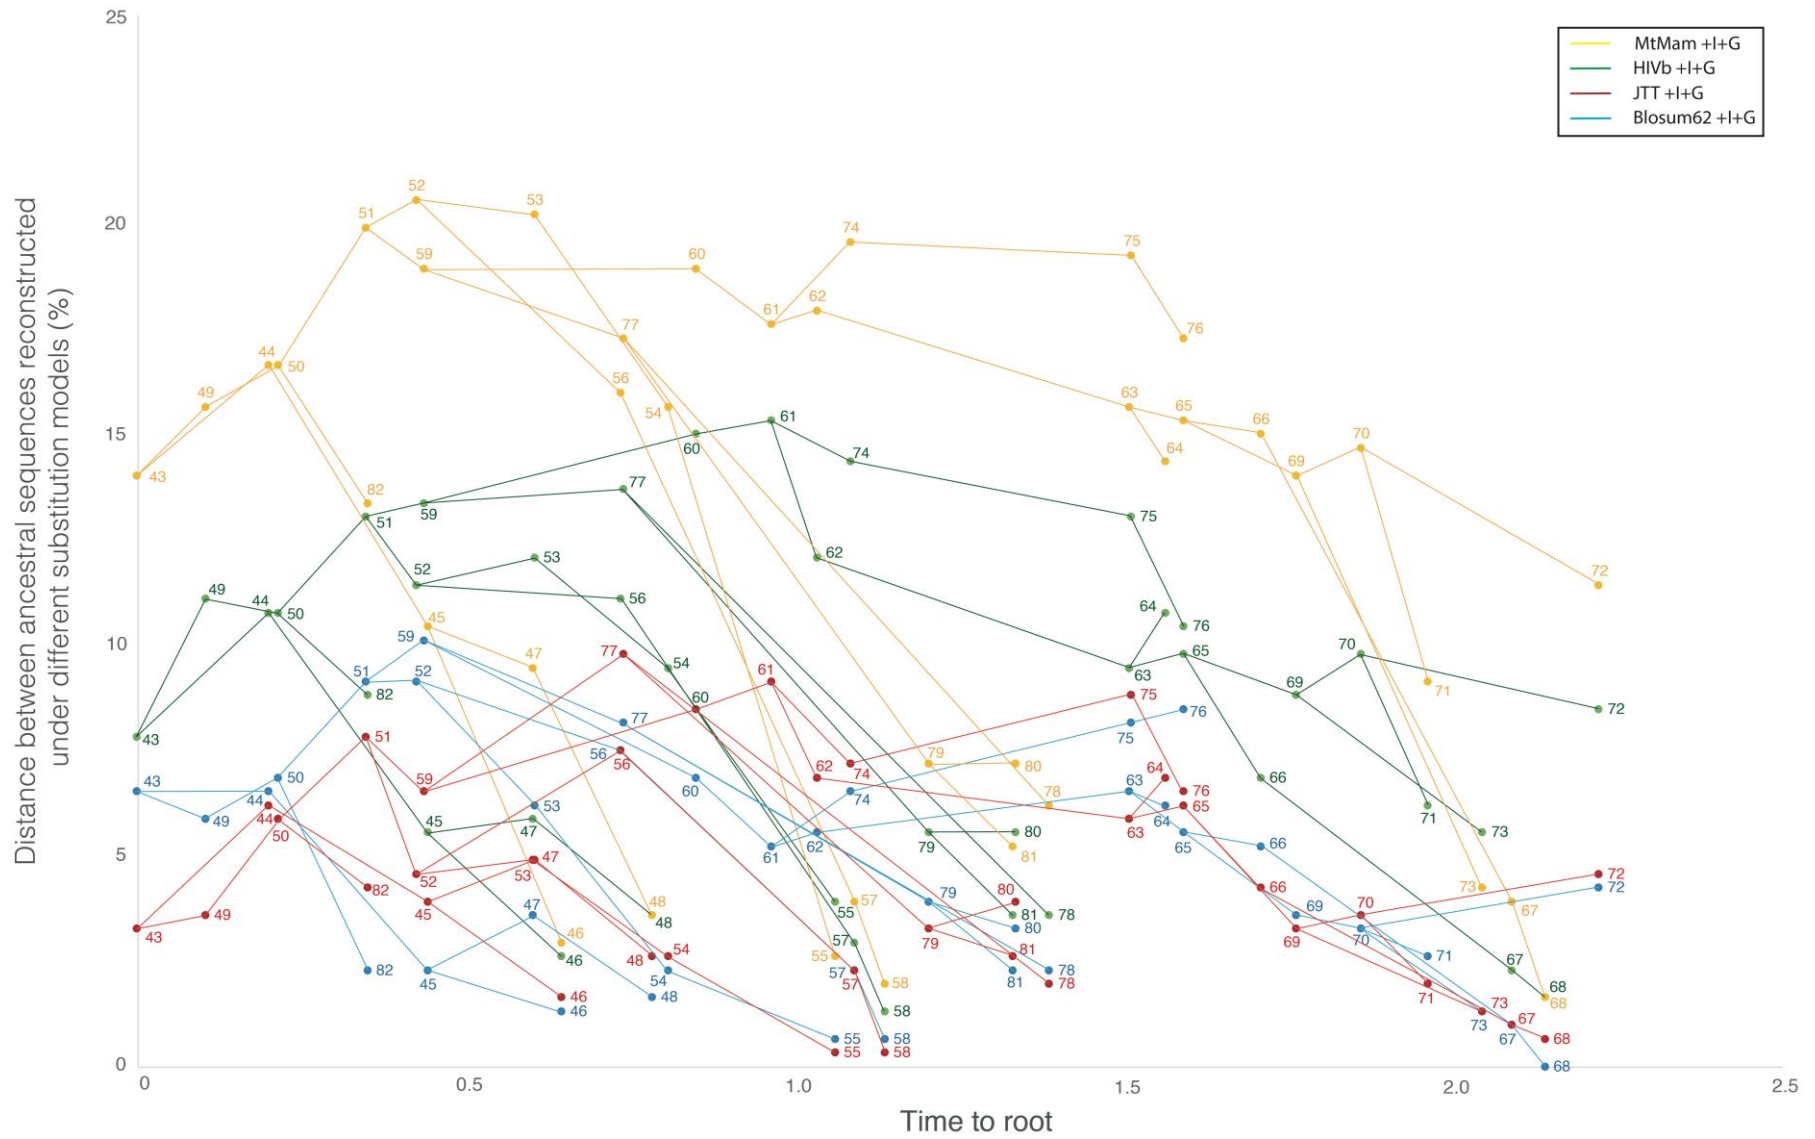

**Figure S5. Influence of substitution model selection on ancestral sequence reconstruction of the DDL protein family.** The figure shows the distance between ancestral sequences reconstructed under the best-fitting substitution model (LG +I+G) and other substitution models (MtMam +I+G, HIVb +I+G, JTT +I+G and Blosum62 +I+G; shown with different colors) at every internal node and as a function of the time to root. Note that all the nodes shown in the figure are internal nodes, the tip nodes are excluded because their sequences are given (thus, they are not reconstructed).

**Table S1. Inferred CTL epitopes from ancestral sequences reconstructed under different substitution models for the HIV-1 group M reference alignment of the HIV-1 *env* region.** Numbers are the CTL epitopes estimated by *MHCPred* for all available alleles in March of 2022. The cut-off value for the IC50 was 50, which only returns CTLs with high affinity. The best-fitting substitution model for the dataset was HIVb +I+G (numbers of epitopes in bold) and results from ancestral sequences reconstructed under other substitution models are included. Below, sum of absolute differences (per HLA allele) of number of epitopes in ancestral sequences reconstructed under the best-fitting substitution model and under other studied substitution models. Note that the substitution model with the exchangeability matrix more similar (HIVw +I+G) to the exchangeability matrix of the best-fitting substitution model (HIVb +I+G) also shows the number of epitopes more similar to the number of epitopes of the best-fitting substitution model.

| HLA Allele | HIVb +I+G  | HIVw +I+G | JTT +I+G | WAG +I+G | Blosum62 +I+G | MtMam +I+G |
|------------|------------|-----------|----------|----------|---------------|------------|
| A0201      | <b>13</b>  | 13        | 7        | 7        | 7             | 7          |
| H2Db       | <b>5</b>   | 5         | 6        | 6        | 7             | 5          |
| H2Kb       | <b>97</b>  | 95        | 107      | 108      | 104           | 106        |
| H2Kk       | <b>47</b>  | 47        | 50       | 51       | 52            | 45         |
| A0101      | <b>3</b>   | 4         | 5        | 8        | 7             | 4          |
| A0202      | <b>15</b>  | 15        | 26       | 25       | 23            | 27         |
| A0203      | <b>222</b> | 224       | 225      | 228      | 223           | 227        |
| A0206      | <b>45</b>  | 43        | 44       | 48       | 46            | 47         |
| A0301      | <b>34</b>  | 43        | 32       | 30       | 27            | 31         |
| A1101      | <b>348</b> | 351       | 374      | 359      | 359           | 369        |
| A3101      | <b>1</b>   | 1         | 2        | 2        | 2             | 2          |
| A6801      | <b>26</b>  | 26        | 25       | 24       | 25            | 25         |
| A6802      | <b>18</b>  | 18        | 13       | 15       | 12            | 14         |
| B3501      | <b>0</b>   | 0         | 0        | 0        | 0             | 0          |
| DRB00101   | <b>342</b> | 339       | 326      | 329      | 327           | 324        |

|            |                    |             |             |             |             |             |
|------------|--------------------|-------------|-------------|-------------|-------------|-------------|
| DRB0401    | <b>4</b>           | 4           | 5           | 9           | 7           | 6           |
| DRB0701    | <b>11</b>          | 11          | 16          | 13          | 13          | 18          |
| IAb        | <b>0</b>           | 0           | 0           | 0           | 0           | 0           |
| IAk        | <b>61</b>          | 58          | 49          | 50          | 49          | 49          |
| IEg        | <b>0</b>           | 0           | 0           | 0           | 0           | 0           |
| IEk        | <b>0</b>           | 0           | 0           | 0           | 0           | 0           |
| IAd        | <b>61</b>          | 59          | 56          | 55          | 58          | 58          |
| IAs        | <b>174</b>         | 177         | 189         | 189         | 183         | 183         |
| IEd        | <b>0</b>           | 0           | 0           | 1           | 1           | 0           |
| TAP        | <b>174</b>         | 175         | 171         | 180         | 168         | 167         |
| <i>All</i> | <b><i>1701</i></b> | <i>1708</i> | <i>1728</i> | <i>1737</i> | <i>1700</i> | <i>1714</i> |

|                    | HIVb +I+G -<br>HIVw +I+G | HIVb +I+G<br>- JTT +I+G | HIVb +I+G -<br>WAG +I+G | HIVb +I+G -<br>Blosum62 +I+G | HIVb +I+G -<br>MtMam +I+G |
|--------------------|--------------------------|-------------------------|-------------------------|------------------------------|---------------------------|
| <i>Differences</i> | <b><i>31</i></b>         | <i>129</i>              | <i>126</i>              | <i>111</i>                   | <i>125</i>                |

**Table S2. Inferred CTL epitopes from ancestral sequences reconstructed under different substitution models for the HIV-1 subtype B reference alignment of the HIV-1 *env* region.** Numbers are the CTL epitopes estimated by *MHCPre*d for all available alleles in March of 2022. The cut-off value for the IC50 was 50, which only returns CTLs with high affinity. The best-fitting substitution model for the dataset was HIVw +I+G (numbers of epitopes in bold) and results from ancestral sequences reconstructed under other substitution models are included. Below, sum of absolute differences (per HLA allele) of number of epitopes in ancestral sequences reconstructed under the best-fitting substitution model and under other studied substitution models. Note that the substitution model with the exchangeability matrix more similar (HIVb +I+G) to the exchangeability matrix of the best-fitting substitution model (HIVw +I+G) also shows the number of epitopes more similar to the number of epitopes of the best-fitting substitution model.

| HLA Allele | HIVw<br>+I+G | HIVb<br>+I+G | JTT +I+G | WAG<br>+I+G | Blosum62<br>+I+G | MtMam<br>+I+G |
|------------|--------------|--------------|----------|-------------|------------------|---------------|
| A0201      | <b>7</b>     | 7            | 13       | 9           | 9                | 13            |
| H2Db       | <b>4</b>     | 3            | 3        | 4           | 4                | 4             |
| H2Kb       | <b>113</b>   | 114          | 104      | 108         | 107              | 105           |
| H2Kk       | <b>59</b>    | 60           | 63       | 63          | 63               | 62            |
| A0101      | <b>5</b>     | 5            | 4        | 4           | 3                | 4             |
| A0202      | <b>21</b>    | 21           | 21       | 22          | 20               | 22            |
| A0203      | <b>239</b>   | 240          | 234      | 229         | 230              | 235           |
| A0206      | <b>39</b>    | 39           | 32       | 34          | 33               | 33            |
| A0301      | <b>28</b>    | 28           | 26       | 26          | 24               | 27            |
| A1101      | <b>383</b>   | 377          | 391      | 394         | 392              | 397           |
| A3101      | <b>3</b>     | 3            | 1        | 2           | 3                | 1             |
| A6801      | <b>25</b>    | 24           | 24       | 25          | 26               | 26            |
| A6802      | <b>19</b>    | 19           | 26       | 26          | 25               | 26            |
| B3501      | <b>0</b>     | 0            | 0        | 0           | 0                | 0             |
| DRB00101   | <b>326</b>   | 321          | 314      | 304         | 304              | 311           |

|            |             |      |      |      |      |      |
|------------|-------------|------|------|------|------|------|
| DRB0401    | <b>3</b>    | 3    | 2    | 2    | 2    | 2    |
| DRB0701    | <b>16</b>   | 16   | 14   | 13   | 14   | 13   |
| IAb        | <b>0</b>    | 0    | 0    | 0    | 0    | 0    |
| IAk        | <b>54</b>   | 54   | 64   | 66   | 67   | 63   |
| IEg        | <b>0</b>    | 0    | 0    | 0    | 0    | 0    |
| IEk        | <b>0</b>    | 0    | 0    | 0    | 0    | 0    |
| IAd        | <b>59</b>   | 57   | 53   | 55   | 55   | 53   |
| IAs        | <b>202</b>  | 201  | 193  | 188  | 189  | 192  |
| IEd        | <b>0</b>    | 0    | 0    | 0    | 0    | 0    |
| TAP        | <b>134</b>  | 131  | 136  | 134  | 137  | 136  |
| <i>All</i> | <b>1739</b> | 1723 | 1718 | 1708 | 1707 | 1725 |

---

|                    | HIV <sub>w</sub> +I+G -<br>HIV <sub>b</sub> +I+G | HIV <sub>w</sub> +I+G -<br>JTT +I+G | HIV <sub>w</sub> +I+G -<br>WAG +I+G | HIV <sub>w</sub> +I+G -<br>Blosum62<br>+I+G | HIV <sub>w</sub> +I+G -<br>MtMam +I+G |
|--------------------|--------------------------------------------------|-------------------------------------|-------------------------------------|---------------------------------------------|---------------------------------------|
| <i>Differences</i> | <b>22</b>                                        | 95                                  | 105                                 | 108                                         | 100                                   |
